# Supplementary material for: Marker-free co-selection for successive rounds of prime editing in human cells
Source: PubMed Central journal article supplement (PMC9546848; doi:10.1038/s41467-022-33669-z), 2022-10-07
Supplement: 41467_2022_33669_MOESM5_ESM.pdf [file 41467_2022_33669_MOESM5_ESM.pdf]

Title: Supplementary Data 1

Legend: Oligo and DNA sequences, transfection mixes, Addgene vectors
